# Supplementary material for: Etiology and mode of presentation of chronic liver diseases in India: A multi centric study
Source: PubMed Central journal article supplement (PMC5658106; doi:10.1371/journal.pone.0187033), 2017-10-26
Supplement: pone.0187033.s003.pdf [file pone.0187033.s003.pdf]

## S3 Appendix: Approval letter from Institutional Ethics Committee

**Institutional Ethics Committee  
Institute of Post Graduate Medical Education & Research  
244, A.J.C. Bose Road, Kolkata-20.**

Memo No. Inst./IEC/ 841

Date: 05.04.10

To  
Dr. Kausik Das  
Asst. Prof. Dept. of School of Digestive &  
Liver Disease,  
IPGME&R, Kolkata

A meeting of the Institutional Ethics Committee of IPGME&R, Kolkata was held on 27<sup>th</sup> March, 2010 at 12:00 noon. The following members were present:

| Sl. No. | Name                    | Sex | Status            | Affiliation/ Designation                                                               |
|---------|-------------------------|-----|-------------------|----------------------------------------------------------------------------------------|
| 1.      | Prof. Subir Kumar Dutta | M   | Chairman          | Ex-Dean of Faculty of Medicine University of Calcutta & retired Professor of Pathology |
| 2.      | Prof. J. Chatterjee     | M   | Member            | Head, NEMS                                                                             |
| 3.      | Prof. Amal Santra       | M   | Member            | Scientist, Gastroenterology                                                            |
| 4.      | Prof. Swati Chakraborty | F   | Member            | Head, Paed.-Medicine                                                                   |
| 5.      | Prof. R.N. Dutta        | M   | Member            | Head, Skin                                                                             |
| 6.      | Prof. D. Bhattacharyya  | M   | Member- Secretary | Head, Pharmacology                                                                     |

The following project proposal submitted with other relevant documents were discussed:

“HCV: - THE INDIAN FACE”.

List of other documents:

1. Forwarding Letter.
2. Patient Information Forms- English, Bengali, Hindi.
3. Patient Consent Forms- English, Bengali, Hindi.
4. Case Record Form

**Institutional Ethics Committee  
Institute of Post Graduate Medical Education & Research  
244, A.J.C. Bose Road, Kolkata-20.**

After detailed deliberation and review, the following decision was taken:

- Approved
- Disapproved
- Resubmit after modification as detailed below
- Approved earlier but approval withdrawn now for reasons detailed below

Reasons for disapproval    Modifications suggested    Reasons for withdrawing approval

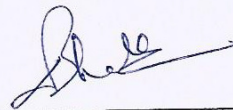

\_\_\_\_\_  
*Member-Secretary*  
Institutional Ethics Committee, IPGME&R, Kolkata-20.

**Member - Secretary**  
**INSTITUTIONAL ETHICS COMMITTEE**  
Institute of Post Graduate Medical Education  
& Research, Kol-20
